# Supplementary material for: Integrated Transcriptome Analysis of miRNAs and mRNAs in the Skeletal Muscle of Wuranke Sheep
Source: MDPI journal article supplement (doi:10.3390/genes14112034), 2023-10-31
Supplement: s1 [file s1]

**Table S3.** Summary of small RNA sequencing data

| Sample | Raw reads | Valid reads | Q20 (%) | Q30 (%) | GC content (%) |
|--------|-----------|-------------|---------|---------|----------------|
| A1     | 12472153  | 9700885     | 97.02   | 89.83   | 50.93          |
| A2     | 13696912  | 9821420     | 97.01   | 89.31   | 51.74          |
| A3     | 10328255  | 7194755     | 96.3    | 88.15   | 51.97          |
| B1     | 12050694  | 10872234    | 99.13   | 97.72   | 49.72          |
| B2     | 12151044  | 11009081    | 99.16   | 97.77   | 49.59          |
| B3     | 12118381  | 10897279    | 99.04   | 97.53   | 50.11          |
| C1     | 12432537  | 10590025    | 99.09   | 97.61   | 50.62          |
| C2     | 11875757  | 9302801     | 99.08   | 97.51   | 51.06          |
| C3     | 12432537  | 11716106    | 99.18   | 97.84   | 49.72          |

Note: A1, A2, and A3 are fetal samples; B1, B2, and B3 are 3-month-old samples; C1, C2, and C3 are 15-month-old samples.
