# Supplementary material for: Integrated Transcriptome Analysis of miRNAs and mRNAs in the Skeletal Muscle of Wuranke Sheep
Source: MDPI journal article supplement (doi:10.3390/genes14112034), 2023-10-31
Supplement: s1 [file s1]

**Table S5.** Expression levels of top 10 highly expressed novel miRNAs

| miRNA           | Fetal<br>(ave. normalized counts) | 3-month-old<br>(ave. normalized counts) | 15-month-old<br>(ave. normalized counts) |
|-----------------|-----------------------------------|-----------------------------------------|------------------------------------------|
| PC-3p-282_33957 | 5067.11                           | 4894.16                                 | 4684.81                                  |
| PC-5p-1150_3588 | 338.46                            | 301.38                                  | 570.13                                   |
| PC-3p-2138_1335 | 1068.98                           | 51.36                                   | 54.17                                    |
| PC-5p-2779_892  | 187.75                            | 196.17                                  | 301.31                                   |
| PC-3p-3522_622  | 363.12                            | 20.51                                   | 9.35                                     |
| PC-5p-3703_578  | 32.78                             | 141.77                                  | 145.58                                   |
| PC-3p-9379_187  | 4.06                              | 82.65                                   | 202.05                                   |
| PC-3p-15581_117 | 0.00                              | 123.39                                  | 162.93                                   |
| PC-5p-10001_176 | 3.21                              | 83.04                                   | 189.87                                   |
| PC-3p-4027_504  | 123.44                            | 73.08                                   | 75.23                                    |
