# Supplementary material for: Integrated Transcriptome Analysis of miRNAs and mRNAs in the Skeletal Muscle of Wuranke Sheep
Source: MDPI journal article supplement (doi:10.3390/genes14112034), 2023-10-31
Supplement: s1 [file s1]

**Table S1.** Primer sequences of miRNAs for RT-qPCR used in this study

| miRNA              | Primer sequences (5'-3')                                                                                                                      |
|--------------------|-----------------------------------------------------------------------------------------------------------------------------------------------|
| oar-miR-1185-5p    | RT: GCACTTCAGTGTCGTGGTCAGTGACGGCAATTTGAAGTGCGAACATA<br>Forward: CAGACGACCATCAGAGAGGATACCCCTTTGTA<br>Reverse: GCACTTCAGTGTCGTGGTCAGTGACGGCAATT |
| oar-miR-299-5p     | RT: GCACTTCAGTGTCGTGGTCAGTGACGGCAATTTGAAGTGCATGTATGT<br>Forward: CAGACGACCATCAGTGGTTTACCGTCCCAC<br>Reverse: GCACTTCAGTGTCGTGGTCAGTGACGGCAATT  |
| oar-miR-370-3p_R-2 | RT: GCACTTCAGTGTCGTGGTCAGTGACGGCAATTTGAAGTGCACCAGGTT<br>Forward: CAGACGACCATCAGGCCTGCTGGGGTGGAA<br>Reverse: GCACTTCAGTGTCGTGGTCAGTGACGGCAATT  |
| oar-miR-380-3p     | RT: GCACTTCAGTGTCGTGGTCAGTGACGGCAATTTGAAGTGCAGACGTGG<br>Forward: CAGACGACCATCAGTATGTAATGTGGTCC<br>Reverse: GCACTTCAGTGTCGTGGTCAGTGACGGCAATT   |
| oar-miR-133        | RT: GCACTTCAGTGTCGTGGTCAGTGACGGCAATTTGAAGTGCACAGCTGG<br>Forward: CAGACGACCATCAGTTGGTCCCCTTCAACC<br>Reverse: GCACTTCAGTGTCGTGGTCAGTGACGGCAATT  |
| oar-miR-150        | RT: GCACTTCAGTGTCGTGGTCAGTGACGGCAATTTGAAGTGCCACTGGTA<br>Forward: CAGACGACCATCAGTCTCCCAACCCCTTGTA<br>Reverse: GCACTTCAGTGTCGTGGTCAGTGACGGCAATT |
| oar-miR-27a        | RT: GCACTTCAGTGTCGTGGTCAGTGACGGCAATTTGAAGTGC GCGGAACT<br>Forward: CAGACGACCATCAGTTCACAGTGGCTAAG<br>Reverse: GCACTTCAGTGTCGTGGTCAGTGACGGCAATT  |
| oar-miR-29a_R+1    | RT: GCACTTCAGTGTCGTGGTCAGTGACGGCAATTTGAAGTGCTAACCGAT<br>Forward: CAGACGACCATCAGTAGCACCATCTGAAAT<br>Reverse: GCACTTCAGTGTCGTGGTCAGTGACGGCAATT  |
| PC-5p-3703_578     | RT: GCACTTCAGTGTCGTGGTCAGTGACGGCAATTTGAAGTGCTCCAGGGC<br>Forward: CAGACGACCATCAGGATGAGGCTCAGCGAGC<br>Reverse: GCACTTCAGTGTCGTGGTCAGTGACGGCAATT |
| <i>U6</i>          | Forward: CTCGCTTCGGCAGCACAT<br>Reverse: GAACGCTTACGAATTTGCGT                                                                                  |
