# Supplementary material for: Integrated Transcriptome Analysis of miRNAs and mRNAs in the Skeletal Muscle of Wuranke Sheep
Source: MDPI journal article supplement (doi:10.3390/genes14112034), 2023-10-31
Supplement: s1 [file s1]

**Table S4.** Expression levels of top 10 highly expressed known miRNAs

| miRNA              | Fetal<br>(ave. normalized counts) | 3-month-old<br>(ave. normalized counts) | 15-month-old<br>(ave. normalized counts) |
|--------------------|-----------------------------------|-----------------------------------------|------------------------------------------|
| oar-miR-133        | 340740.58                         | 3002046.59                              | 3438371.64                               |
| bta-miR-1          | 118670.11                         | 1171679.50                              | 1056407.28                               |
| oar-miR-26a        | 197141.95                         | 324122.68                               | 342909.37                                |
| oar-miR-143_R+1    | 57954.32                          | 475884.82                               | 282383.10                                |
| oar-let-7a         | 377362.60                         | 178959.63                               | 178744.08                                |
| oar-miR-127_L-1    | 687379.38                         | 30951.87                                | 14202.53                                 |
| chi-miR-451-5p_R+4 | 32212.16                          | 331050.01                               | 351419.80                                |
| chi-miR-378-3p     | 133904.65                         | 298905.00                               | 243592.90                                |
| oar-miR-125b_R+1   | 216645.73                         | 158314.04                               | 134291.34                                |
| chi-miR-206_R-1    | 292338.20                         | 111175.92                               | 96857.84                                 |
