# Supplementary material for: Integrated Transcriptome Analysis of miRNAs and mRNAs in the Skeletal Muscle of Wuranke Sheep
Source: MDPI journal article supplement (doi:10.3390/genes14112034), 2023-10-31
Supplement: s1 [file s1]

**Table S2.** Primer sequences of mRNAs for RT-qPCR used in this study

| mRNA           | Primer sequences (5'-3')                                               |
|----------------|------------------------------------------------------------------------|
| <i>FBP2</i>    | Forward: GACCACAGGCACCCAACC<br>Reverse: CTCATCACCAGCATTCACTCACTT       |
| <i>MYH10</i>   | Forward: TCATCTACAACCCTGCCACTCA<br>Reverse: CGCCAACTCCACCATAACTTCAT    |
| <i>HDAC1</i>   | Forward: CGCCCTCACAAAGCCAATG<br>Reverse: GCCACAGAGCCACCAGTAG           |
| <i>ITGB1</i>   | Forward: GGAGCCACAGACATTCACTAA<br>Reverse: ACGAAAGAGCCAAACCCGATT       |
| <i>COL4A1</i>  | Forward: AGAGCGGAGCGAGATGTTCA<br>Reverse: GGAGGAGGGAGTAGCACCATTC       |
| <i>HSP90B1</i> | Forward: GACACCGCAGAAGACACAGA<br>Reverse: TTCACATTCCCTCTCCACACAG       |
| <i>CANX</i>    | Forward: TTGTCATCCTCTTCTGCTGTTCTG<br>Reverse: TTCTCTTCACCTTCCTCCTCTTCA |
| <i>GAPDH</i>   | Forward: GGTCGGAGTGAACGGATTG<br>Reverse: TGGCAACGATGTCCACTTTG          |
