# Supplementary material for: Integrated Transcriptome Analysis of miRNAs and mRNAs in the Skeletal Muscle of Wuranke Sheep
Source: MDPI journal article supplement (doi:10.3390/genes14112034), 2023-10-31
Supplement: s1 [file s1]

**Table S6.** Summary of mRNA sequencing data

| Sample | Raw reads | Valid reads | Mapped reads | Q20 (%) | Q30 (%) | GC content (%) |
|--------|-----------|-------------|--------------|---------|---------|----------------|
| A1     | 12472153  | 9700885     | 48900793     | 99.74   | 95.82   | 50.00          |
| A2     | 13696912  | 9821420     | 55623639     | 99.55   | 95.02   | 48.50          |
| A3     | 10328255  | 7194755     | 53334762     | 99.61   | 94.95   | 49.00          |
| B1     | 12050694  | 10872234    | 40110679     | 99.63   | 93.95   | 47.00          |
| B2     | 12151044  | 11009081    | 40428908     | 99.67   | 93.92   | 47.00          |
| B3     | 12118381  | 10897279    | 51414258     | 99.34   | 92.21   | 47.00          |
| C1     | 12432537  | 10590025    | 48180297     | 99.48   | 93.14   | 47.00          |
| C2     | 11875757  | 9302801     | 52761574     | 99.31   | 92.05   | 47.00          |
| C3     | 12432537  | 11716106    | 45407150     | 99.26   | 91.88   | 48.00          |

Note: A1, A2, and A3 are fetal samples; B1, B2, and B3 are 3-month-old samples; C1, C2, and C3 are 15-month-old samples.
